# Supplementary material
Source: PubMed Central journal article supplement (PMC3111085)
Supplement: NIHMS184297-supplement-supplementary_data.pdf [file NIHMS184297-supplement-supplementary_data.pdf]

**The AIM2 inflammasome is critical for innate immunity against *Francisella tularensis***

Teresa Fernandes-Alnemri\*†, Je-Wook Yu\*†, Christine Juliana\*, Leobaldo Solorzano\*, Seokwon Kang\*, Jianghong Wu\*, Pinaki Datta\*, Margaret McCormick\*, Lan Huang<sup>^</sup>, Erin McDermott<sup>^</sup>, Laurence Eisenlohr<sup>^</sup>, Carlisle P. Landel<sup>^</sup>, and Emad S. Alnemri\*

\*Department of Biochemistry and Molecular Biology, and the Kimmel Cancer Center, Thomas Jefferson University, Philadelphia, PA 19107, USA

<sup>^</sup>Department of Microbiology and Immunology, and the Kimmel Cancer Center, Thomas Jefferson University, Philadelphia, PA 19107, USA

† These authors contributed equally to this work.

Correspondence: [ealnemri@mail.jci.tju.edu](mailto:ealnemri@mail.jci.tju.edu)

Supplementary Figure 1

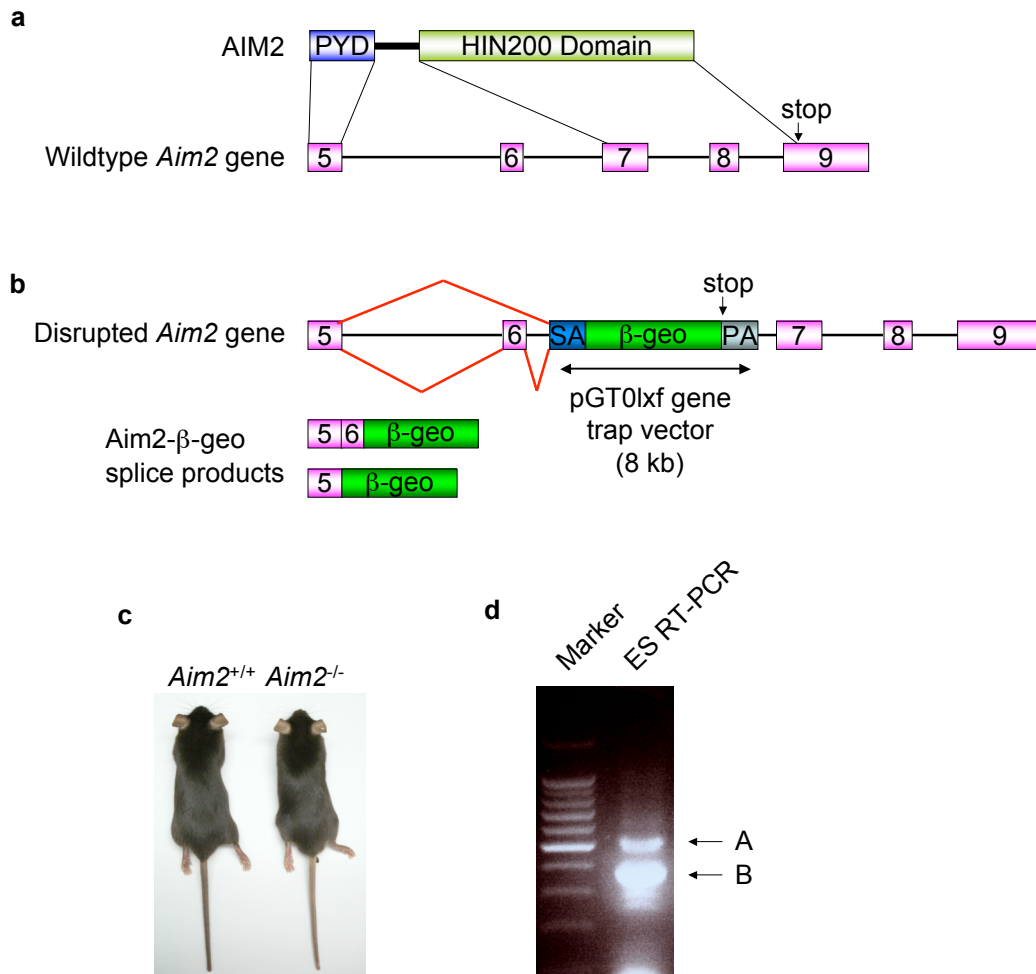

**Supplementary Figure 1** Generation of AIM2-deficient mice.

(a) Schematic representation of the wildtype *Aim2* gene (lower diagram) showing its exons 5-9 (boxes) and the intronic regions (lines) between them. Exon 5 encodes the PYD, whereas exons 7-9 encode the HIN200 DNA binding domain of AIM2 protein (upper diagram). Exon 6 encodes the linker region between the PYD and HIN200 domains of AIM2. (b) Schematic representation of the pGT01xf gene trap vector insertion into the intron following exon 6 of the *Aim2* gene. The splice acceptor (SA) of the pGT01xf gene trap vector interrupts normal splicing of the *Aim2* gene allowing the downstream vector sequence to be transcribed. The gene trap cassette contains a combination of selection and reporter constructs ( $\beta$ -geo) and is followed by a polyadenylation (PA) signal, which causes a stop in translation. The insertion leads to the synthesis of a severely truncated fusion protein (AIM2- $\beta$ -geo), which lacks the entire DNA binding HIN200 domain of AIM2 fused to  $\beta$ -geo reporter. (c) A photograph of one *Aim2*<sup>+/+</sup> and its *Aim2*<sup>-/-</sup> littermate showing normal phenotype of *Aim2*<sup>-/-</sup> mouse. (d) RT-PCR analysis of mRNA from the *Aim2*-genetrapped ES cell clone (BayGenomics clone CSG445) with genetrapp specific primers.

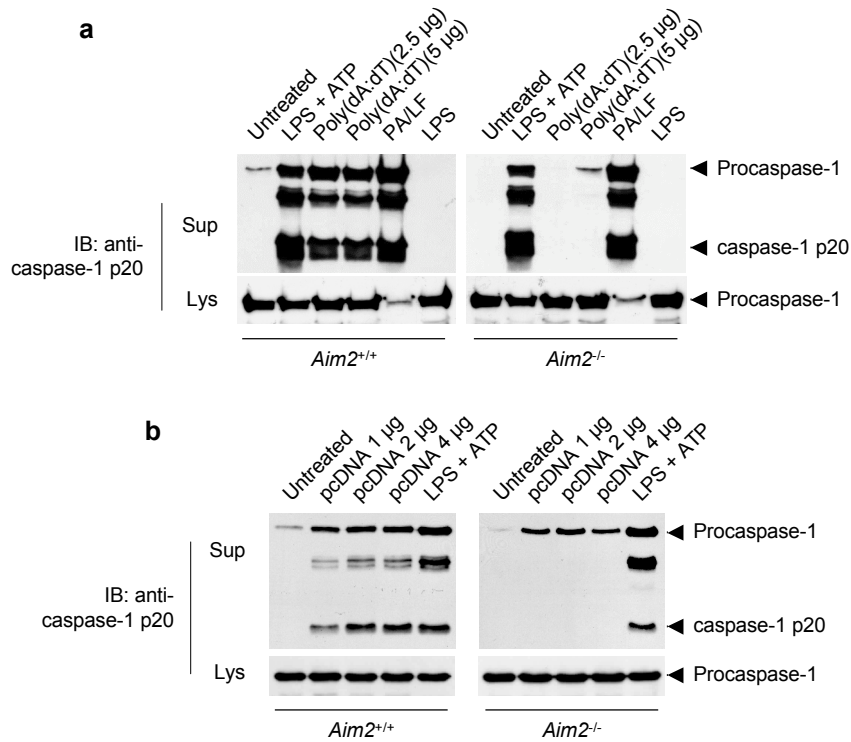

**Supplementary Figure 2** AIM2 deficiency does not affect caspase-1 activation by Nlrp1 and Nlrp3 stimuli. **(a)** Immunoblots for mouse caspase-1 in culture supernatants (upper panels) and cell lysates (lower panels) of mouse *Aim2<sup>+/+</sup>* (left panels) or *Aim2<sup>-/-</sup>* (right panels) BMDMs, left untreated, or treated with LPS (500 ng/ml) for 5h followed with ATP (5 mM) for 45 min, or treated with anthrax toxin PA/LF for 3h, or transfected with 2.5 or 5 µg synthetic DNA poly(dA:dT) for 3h, as indicated. Note the activation of caspase-1 by LPS plus ATP (Nlrp3 stimulus) or anthrax toxin PA/LF (Nlrp1 stimulus) is not affected by AIM2 deficiency. **(b)** Immunoblots for mouse caspase-1 in culture supernatants (upper panels) and cell lysates (lower panels) of mouse *Aim2<sup>+/+</sup>* (left panels) or *Aim2<sup>-/-</sup>* (right panels) BMDMs, left untreated, or treated with LPS (500 ng/ml) for 5h followed with ATP (5 mM) for 45 min, or transfected with increasing amounts of pcDNA plasmid for 3h, as indicated. Sup, culture supernatants. Lys, Cell lysates

Supplementary Figure 3

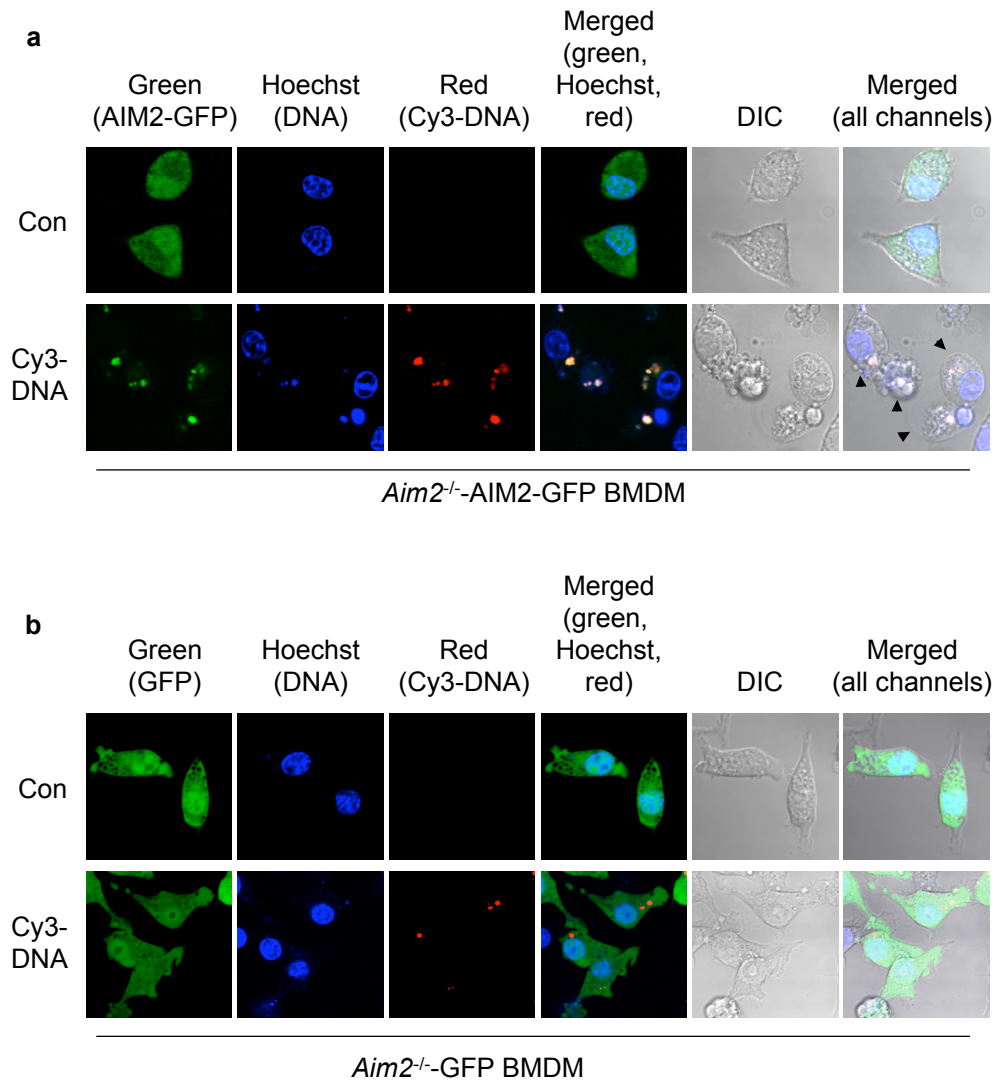

**Supplementary Figure 3** Reconstitution of *Aim2<sup>-/-</sup>*-macrophages with AIM2-GFP restores their responsiveness to transfected DNA. Confocal live cell images of *Aim2<sup>-/-</sup>*-AIM2-EGFP-N1 (**a**), or *Aim2<sup>-/-</sup>*-EGFP-N1 (**b**) immortalized bone marrow macrophages following transfection with vehicle (control, upper panels) or Cy<sup>TM</sup>3-labeled DNA (lower panels). The green (AIM2-GFP in **a**, or GFP in **b**), red (Cy<sup>TM</sup>3-labeled DNA), gray (DIC), and blue (Hoechst stain, nucleus and DNA) channels, and the merged channels are indicated. The arrows (**a**, 6<sup>th</sup> panel from left in the lower row) indicate pyroptotic cells containing oligomerized AIM2-GFP-DNA complexes. Note the pyroptotic cell death features induced by the Cy<sup>TM</sup>3-labeled DNA in *Aim2<sup>-/-</sup>*-AIM2-EGFP-N1 macrophages (**a**, lower panels), but not in the *Aim2<sup>-/-</sup>*-EGFP-N1 (**b**, lower panels). Con, control untransfected (Upper panels in **a** and **b**). Cy3-DNA, Cy3-DNA transfected (lower panels in **a** and **b**).

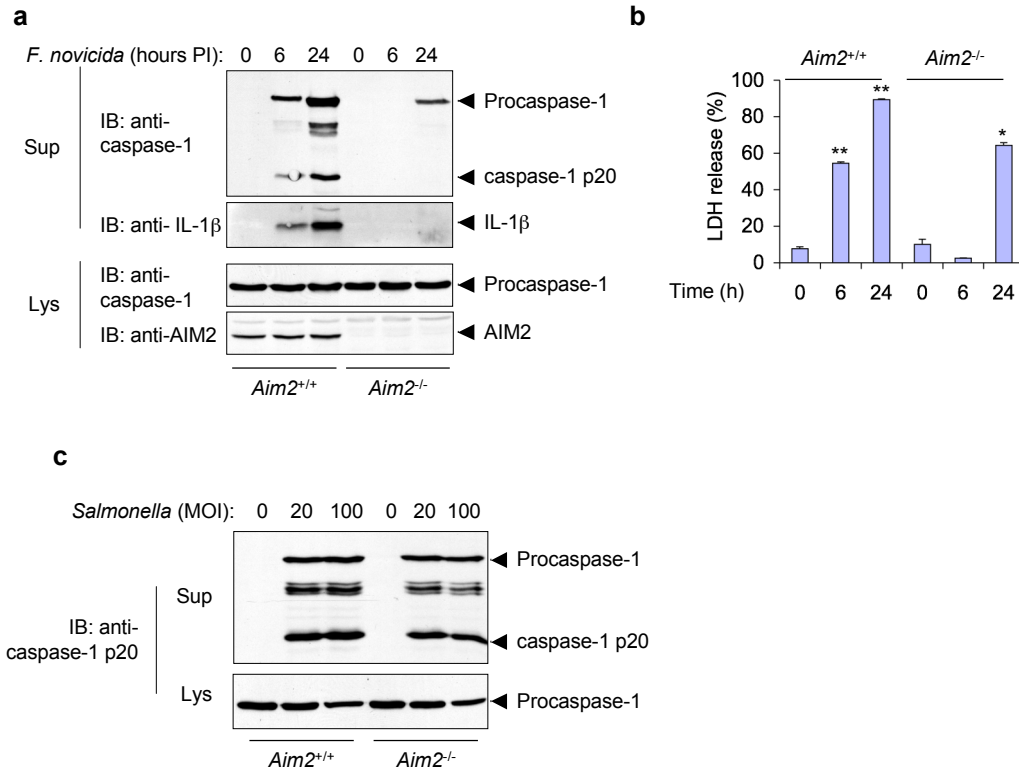

**Supplementary Figure 4:** Caspase-1 activation and IL-1 $\beta$  release require AIM2 after *Francisella*, but not *Salmonella* infection. **a**, Immunoblots for mouse caspase-1 and IL-1 $\beta$  in culture supernatants (upper two panels) of mouse *Aim2*<sup>+/+</sup> (1<sup>st</sup> to 3<sup>rd</sup> lanes) or *Aim2*<sup>-/-</sup> (4<sup>th</sup> to 6<sup>th</sup> lanes) BMDMs, 0, 6 or 24 hours post-infection (PI) with *F. novicida*, as indicated. The lower two panels show immunoblots for mouse caspase-1 and AIM2 in the corresponding cell lysates. Asterisks indicate significant differences between untreated and infected group (b,  $n = 3$ ; \*,  $P < 0.005$ ; \*\*,  $P < 0.001$ ). **b**, Percentages of LDH release into the culture supernatants of the BMDMs described in (a) above. **c**, Immunoblot for mouse caspase-1 in culture supernatants (upper panel) or cell lysates of mouse *Aim2*<sup>+/+</sup> (1<sup>st</sup> to 3<sup>rd</sup> lanes) or *Aim2*<sup>-/-</sup> (4<sup>th</sup> to 6<sup>th</sup> lanes) BMDMs, infected with the indicated MOIs of *Salmonella* for 3 h, as indicated.

**a**

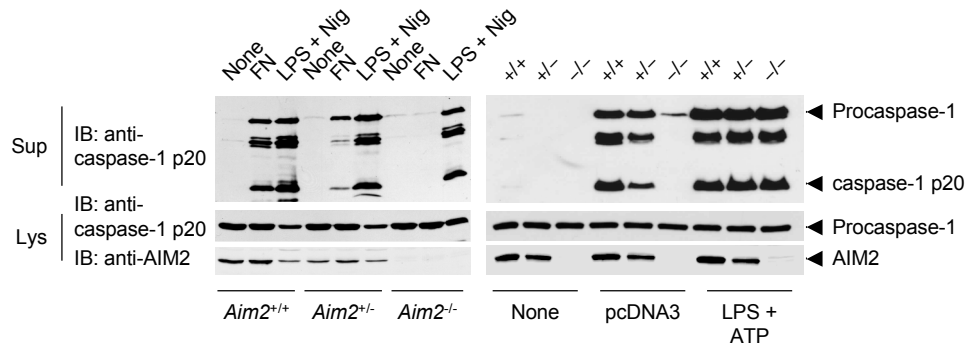

**b**

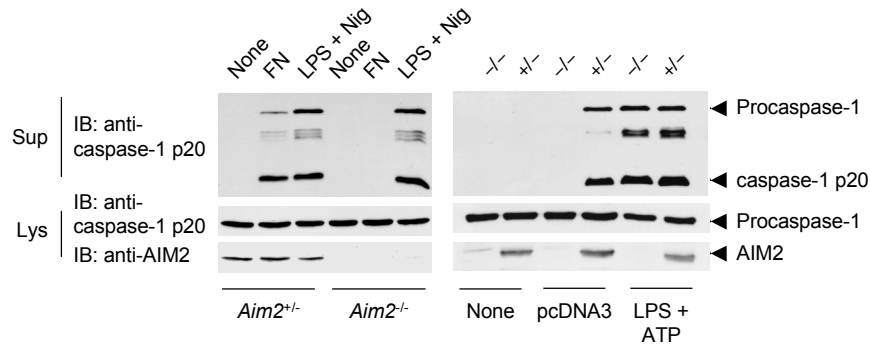

**Supplementary Figure 5** Effect of *Aim2* heterozygosity on caspase-1 activation by *Francisella* infection or transfected DNA. **(a)** Immunoblots for mouse caspase-1 in culture supernatants of macrophages derived from littermates (siblings) generated from interbreeding of heterozygous *Aim2*<sup>+/-</sup> parents, infected with the indicated *F. novicida* (MOI 250) or treated with LPS (500 ng/ml) for 5h followed with nigericin (2.5  $\mu$ M) for 45 min, as indicated (upper left panels), or transfected with pcDNA3 (4  $\mu$ g) for 6 h, or treated with LPS (500 ng/ml) for 5h followed with ATP (5 mM) for 45 min as indicated (upper right panels). **(b)** Immunoblots for mouse caspase-1 in culture supernatants of macrophages derived from *Aim2*<sup>-/-</sup> and *Aim2*<sup>+/-</sup> littermates (siblings) generated from interbreeding of a homozygous *Aim2*<sup>-/-</sup> with its heterozygous *Aim2*<sup>+/-</sup> sibling, infected with *F. novicida* (MOI 250) or treated with LPS (500 ng/ml) for 5h followed with nigericin (2.5  $\mu$ M) for 45 min, as indicated (upper left panels), or transfected with pcDNA3 (4  $\mu$ g) for 6 h, or treated with LPS (500 ng/ml) for 5h followed with ATP (5 mM) for 45 min as indicated (upper right panels). Similar results were obtained with macrophages derived from two additional *Aim2*<sup>-/-</sup> and *Aim2*<sup>+/-</sup> littermates (siblings) from the same progeny of this cross between the *Aim2*<sup>-/-</sup> X *Aim2*<sup>+/-</sup> siblings in **b** (not shown). The lower panels in **a** and **b** show immunoblots for mouse caspase-1 and AIM2 in the corresponding cell lysates.

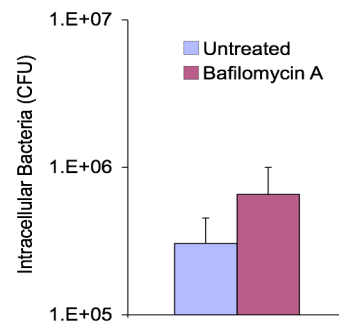

**Supplementary Figure 6** Intracellular growth of *F. novicida* in *Aim2*<sup>-/-</sup> BMDMs treated with bafilomycin. *F. novicida* were inoculated at an MOI of ~50 into untreated or bafilomycin-treated *Aim2*<sup>-/-</sup> BMDMs. After 1 h incubation at 37° C and 5 % CO<sub>2</sub>, gentamycin (50 µg/ml) was added to the medium to eliminate extracellular bacteria. The macrophage cells were lysed with 0.2 % deoxycholate at 3 h post-infection, and the lysate was plated on Cystine Heart Agar plates and incubated at 37° C for 24 h, and CFU were enumerated.

Supplementary Figure 7

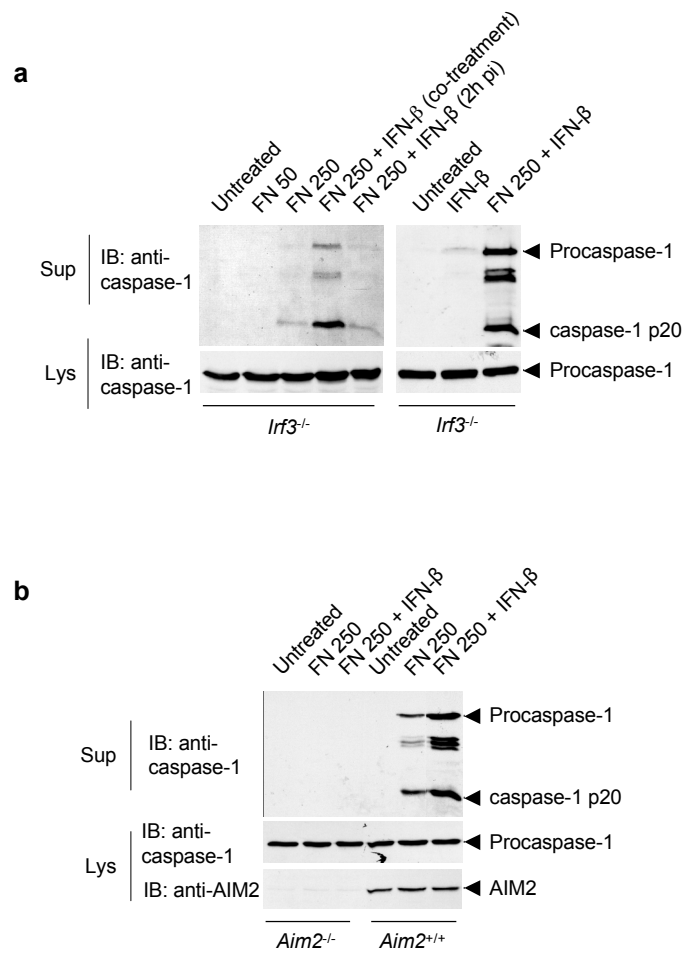

**Supplementary Figure 7** *Francisella*-induced caspase-1 activation in *lrf3*<sup>-/-</sup> macrophages requires priming with IFN- $\beta$ . (a and b) Immunoblots for mouse caspase-1 in culture supernatants of mouse *lrf3*<sup>-/-</sup> (a, upper panels), or *Aim2*<sup>+/+</sup> or *Aim2*<sup>-/-</sup> (b, upper panel) BMDMs, infected with the indicated MOIs of *F. novicida*, in the presence or absence of IFN- $\beta$  (250 U/ml), as indicated. The lower panels show immunoblots for mouse caspase-1 and AIM2 in the corresponding cell lysates.



Supplementary Figure 8

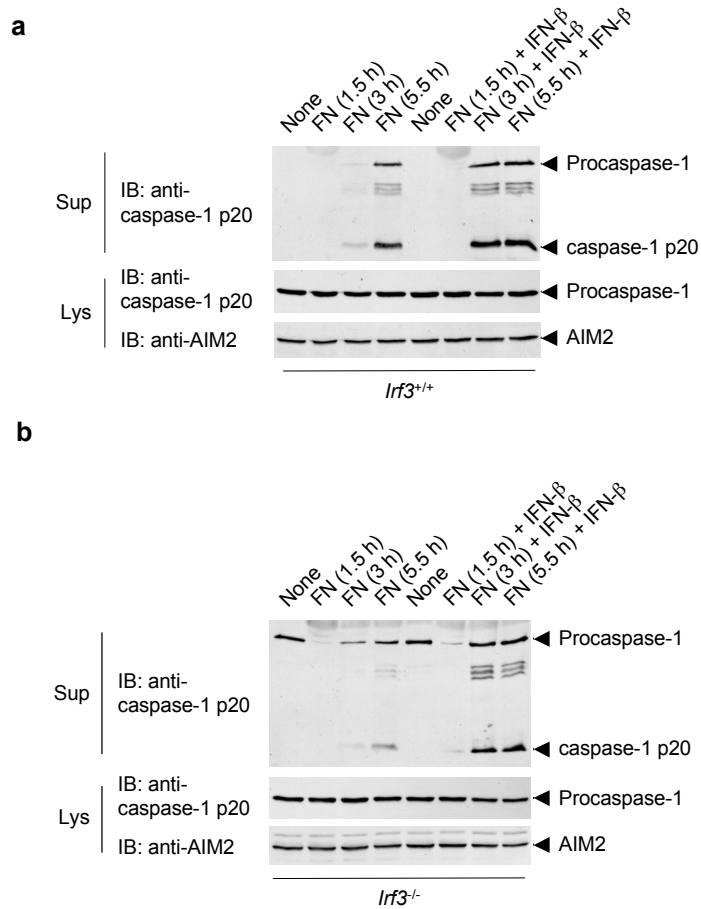

**Supplementary Figure 8:** Time course analysis of the effect of IFN- $\beta$  priming on AIM2 inflammasome activation by *Francisella*. (**a** and **b**) Immunoblots for mouse caspase-1 in culture supernatants of mouse *Irf3*<sup>+/+</sup> (**a**, upper panel) or *Irf3*<sup>-/-</sup> (**b**, upper panel) BMDMs, untreated or treated with IFN- $\beta$  for 2 h followed by infection with of *F. novicida* (MOI 250) for the indicated periods of time. The lower panels show immunoblots for mouse caspase-1 and AIM2 in the corresponding cell lysates.

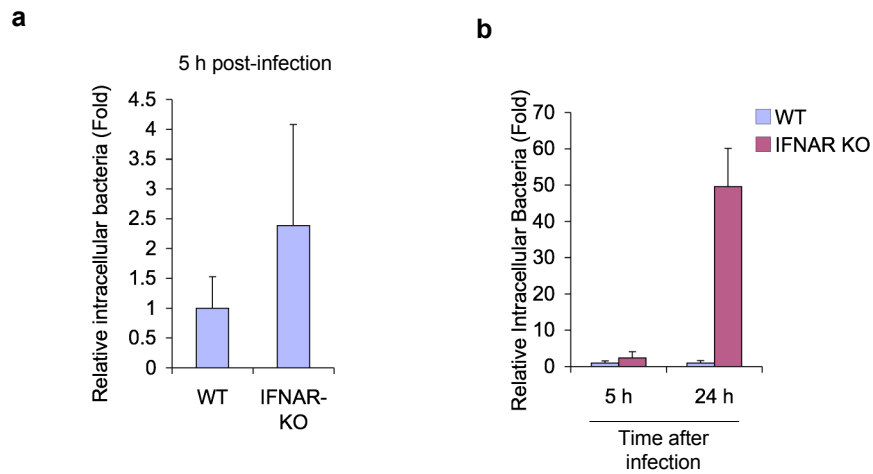

**Supplementary Figure 9** Intracellular growth of *F. novicida* in WT and *Ifnar1*<sup>-/-</sup> BMDMs at 5 h (**a**) and 24h (**b**) post-infection. *F. novicida* were inoculated at an MOI of ~50 into WT or *Ifnar1*<sup>-/-</sup> BMDMs. After 1 h incubation at 37° C and 5 % CO<sub>2</sub>, gentamycin (50 µg/ml) was added to the medium to eliminate extracellular bacteria. The macrophage cells were lysed with 0.2 % deoxycholate at 3 h post-infection, and the lysate was plated on Cystine Heart Agar plates and incubated at 37° C for 5h or 24 h, and CFU were enumerated.

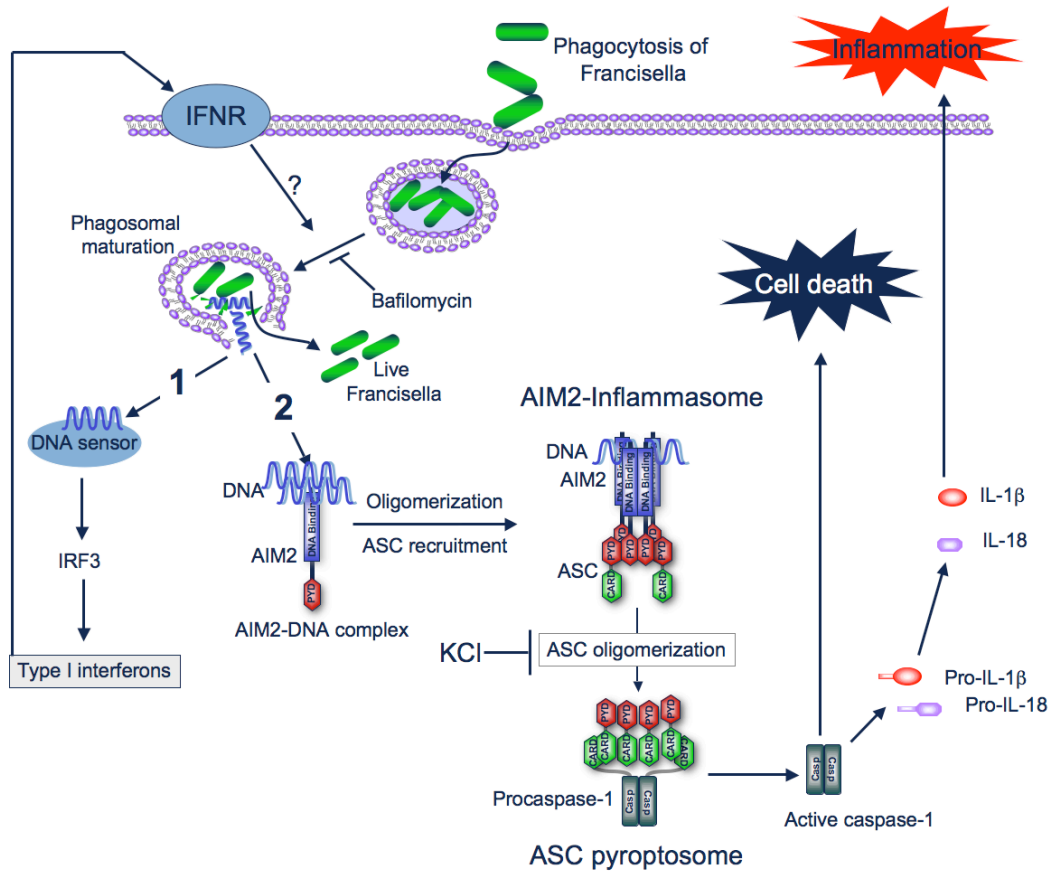

**Supplementary Figure 10** A model depicting how *Francisella* infection leads to the activation of the AIM2 inflammasome. See discussion for details.

Supplementary Figure 11

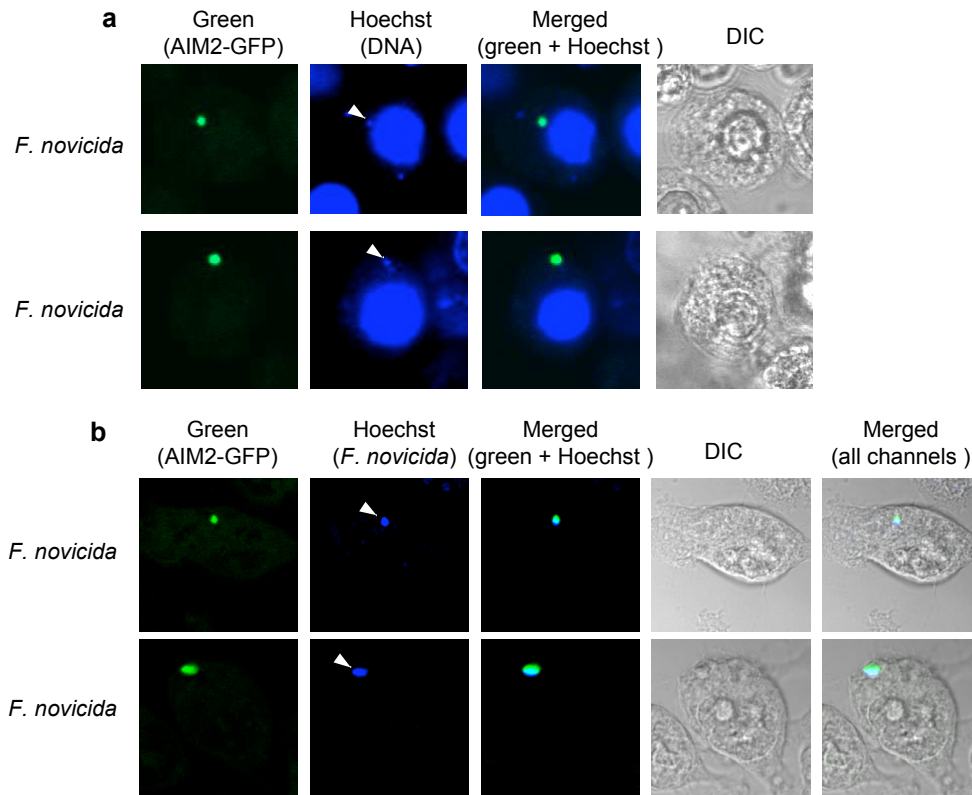

**Supplementary Figure 11** *Francisella* DNA and AIM2 co-localize in *Francisella*-infected cells. **(a)** Enlarged confocal live cell images of *Nlrp3*<sup>-/-</sup>-AIM2-EGFP-N1 BMDMs infected with *F. novicida* for 6 h and then stained with Hoechst stain before microscopy. The white arrows in the blue channel indicate staining of AIM2-GFP clusters with the DNA-specific blue Hoechst stain. **(b)** Enlarged confocal cell images of *Nlrp3*<sup>-/-</sup>-AIM2-EGFP-N1 BMDM infected with Hoechst-labeled *F. novicida* for 6 h and then fixed on coverslips before confocal microscopy. The white arrow in the blue channel (lower panels) indicates the Hoechst-labeled *Francisella* cytoplasmic DNA.

## SUPPLEMENTARY METHODS

**Generation of AIM2 deficient mice.** AIM2-deficient mice were generated by the gene trap method<sup>13</sup>, from an ES cell clone obtained from the International Gene Trap Consortium<sup>12</sup>. All mice were used in experiments following protocols approved by Institutional Animal Care and Use Committee, Thomas Jefferson University. To identify ES cell clone(s) containing a gene trap disrupted mouse *Aim2* gene, we used the open reading frame of mouse *Aim2* to search the NCBI mouse gene trap sequences database (<http://www.ncbi.nlm.nih.gov/genome/seq/BlastGen/BlastGen.cgi?taxid=10090>) with the BLAST program. This search identified one ES clone (gb|DX812645.1|) that contains the pGT0lxf gene trap vector inserted in the *Aim2* gene resulting in a transcriptional fusion product containing *Aim2* exon 5, which encodes the initiator methionine fused to  $\beta$ -galactosidase/neomycin reporter,  $\beta$ -geo. This *Aim2* gene trapped ES cell clone (BayGenomics clone CSG445) was obtained from the Mutant Mouse Regional Resource Centers and further verified in our lab by RT-PCR and DNA sequencing. RT-PCR analysis of mRNA from this ES clone showed that these cells express two *Aim2* transcriptional fusion products (**Supplementary Fig. 1d**). Sequence analysis of these products revealed that the minor longer splice isoform represent a fusion of *Aim2* exons 5 and 6 fused to  $\beta$ -geo, whereas the major shorter splice isoform represent an alternative splice variant of *Aim2* exon 5 fused to  $\beta$ -geo (**Supplementary Fig. 1b**). Both AIM2-geo fusion products thus lack the entire C-terminal oligonucleotide/oligosaccharide-binding domain (HIN200 domain) (**Supplementary Fig. 1a**). Based on these

results PCR analysis of the intronic region following *Aim2* exon 6 was performed to verify the integration of the gene trap vector in this region. This analysis revealed the gene trap vector has inserted in the intron following *Aim2* exon 6. Chimeric mice were produced by injection of the ES clone into C57BL/6 female host blastocysts by our Transgenic and Gene Targeting Facility at Kimmel Cancer Center and the resulting chimeric mice were outbred to C57BL/6 females. Three chimeric male mice transmitted the *Aim2* gene trap allele through their germ line and were used in subsequent outbreeding with C57BL/6J females to produce F1 heterozygous (*Aim2*<sup>+/-</sup>) pups. F1 heterozygous (*Aim2*<sup>+/-</sup>) mice were interbred to produce F2 homozygous *Aim2*<sup>-/-</sup> and *Aim2*<sup>+/+</sup> littermates. The lack of AIM2 expression in the *Aim2*<sup>-/-</sup> was confirmed by immunoblot analysis with an anti-mouse AIM2 polyclonal antibody.

**Assay of ASC pyroptosome formation in macrophages.** These experiments were performed essentially as described recently<sup>44</sup>. Macrophages were seeded in 6-well plates (2 x 10<sup>6</sup> cells/well) and then infected with *F. novicida* in 1 ml of OPTI-MEM<sup>®</sup> I medium for 6 hours in the absence or presence of different concentrations of KCl. In some experiments macrophages were transfected with poly(dA:dT) for 6h or treated with vehicle or LPS for 5h, followed by nigericin (2.5 μM) for 45 min in SF OPTI-MEM<sup>®</sup>I. The culture supernatants were collected and used for immunoblot analysis of secreted caspase-1 p20 as described above. The cells were pelleted by centrifugation and lysed in 0.5 ml buffer containing 20 mM HEPES-KOH, pH7.5, 150 mM KCl, 1 % NP40, 0.1 mM PMSF and protease

inhibitor cocktail on ice by syringing 10 X. The cell lysates were centrifuged at 6000 rpm at 4°C for 10 min. The pellets were washed 2 X with PBS and then re-suspended in 500 µl PBS. The re-suspended pellets were cross-linked with fresh disuccinimidyl suberate (DSS, 2 mM) for 30 min as described before <sup>45</sup>, and then pelleted by centrifugation at 6000 rpm for 10 min. The cross-linked pellets were resuspended in 30 µl SDS sample buffer and fractionated on 12 % SDS-polyacrylamide gel followed by immunoblotting with anti-mouse ASC antibody.
